# Supplementary material for: Activation of molecular oxygen by a molybdenum complex for catalytic oxidation
Source: Royal Society of Chemistry journal article supplement (doi:10.1039/c5dt02931g), 2015-01-01
Supplement: c5dt02931g1.pdf [file c5dt02931g1.pdf]

Supporting information for:

**Activation of Molecular Oxygen by a Molybdenum Complex  
for Catalytic Oxidation**

Antoine Dupé,<sup>†a</sup> Martina E. Judmaier,<sup>†a</sup> Ferdinand Belaj<sup>a</sup>, Klaus Zangger<sup>b</sup> and Nadia C. Mösch-Zanetti<sup>\*a</sup>

<sup>a</sup>*Institute of Chemistry, University of Graz, Schubertstrasse 1, 8010 Graz, Austria  
email: noadia.moesch@uni-graz.at*

<sup>b</sup>*Institute of Chemistry, University of Graz, Heinrichstrasse 28/II, 8010 Graz, Austria*

† These authors contributed equally to this work

|                                                                                                                                                                                                               |           |
|---------------------------------------------------------------------------------------------------------------------------------------------------------------------------------------------------------------|-----------|
| <b>Figure S 1</b> : Low-temperature <sup>31</sup> P NMR spectrum of complex <b>2</b> with OPMe <sub>3</sub> and excess PMe <sub>3</sub> in toluene-d <sub>8</sub> .                                           | <b>2</b>  |
| <b>Figure S 2</b> : Overlay of 2D DOSY spectra in benzene-d <sub>6</sub> .                                                                                                                                    | <b>3</b>  |
| <b>Figure S 3</b> : <sup>31</sup> P and <sup>1</sup> H NMR spectra in benzene-d <sub>6</sub> of the re-oxidation of the complex <b>2</b> with O <sub>2</sub> .                                                | <b>4</b>  |
| <b>Figure S 4</b> : UV-Vis spectra of the reaction of <b>1</b> + 100 equiv PMe <sub>3</sub> .                                                                                                                 | <b>5</b>  |
| <b>Oxygen Atom Transfer reactivity of [MoO(O<sub>2</sub>)L<sub>2</sub>] (<b>4</b>)</b>                                                                                                                        | <b>6</b>  |
| <b>Figure S 5</b> : <sup>1</sup> H NMR spectrum at t = 5 h of the reaction of molybdenum oxo-peroxo complex <b>4</b> with 2 equiv PMe <sub>3</sub> in benzene-d <sub>6</sub> under O <sub>2</sub> exclusion.  | <b>6</b>  |
| <b>Figure S 6</b> : <sup>1</sup> H NMR spectrum at t = 30 h of the reaction of molybdenum oxo-peroxo complex <b>4</b> with 2 equiv PMe <sub>3</sub> in benzene-d <sub>6</sub> under O <sub>2</sub> exclusion. | <b>7</b>  |
| <b>Catalytic oxidation of trimethylphosphine</b>                                                                                                                                                              | <b>7</b>  |
| <b>Figure S 7</b> : <sup>31</sup> P NMR spectrum at t = 24 h of the catalytic oxidation of PMe <sub>3</sub> under O <sub>2</sub> atmosphere using 1 mol-% of complex <b>1</b> .                               | <b>8</b>  |
| <b>Figure S 8</b> : <sup>1</sup> H NMR spectrum at t = 24 h of the catalytic oxidation of PMe <sub>3</sub> under O <sub>2</sub> atmosphere using 1 mol-% of complex <b>1</b> .                                | <b>8</b>  |
| <b>Figure S 9</b> : <sup>31</sup> P NMR spectrum at t = 24 h of the catalytic oxidation of PMe <sub>3</sub> under O <sub>2</sub> atmosphere in the absence of complex <b>1</b> .                              | <b>9</b>  |
| <b>Figure S 10</b> : <sup>1</sup> H NMR spectrum at t = 24 h of the catalytic oxidation of PMe <sub>3</sub> under O <sub>2</sub> atmosphere in the absence of complex <b>1</b> .                              | <b>10</b> |
| <b>X-RAY STRUCTURE DETERMINATION</b>                                                                                                                                                                          | <b>10</b> |
| <b>Crystal Structure Determination of <b>1</b></b>                                                                                                                                                            | <b>10</b> |
| <b>Crystal Structure Determination of <b>4</b></b>                                                                                                                                                            | <b>11</b> |
| <b>Table S 1</b> : Crystallographic data and structure refinements for complexes <b>1</b> and <b>4</b> .                                                                                                      | <b>12</b> |
| <b>Figure S 11</b> : Stereoscopic ORTEP plot of <b>1</b> showing the atomic numbering scheme.                                                                                                                 | <b>13</b> |
| <b>Figure S 12</b> : Stereoscopic ORTEP plot of <b>4</b> showing the atomic numbering scheme.                                                                                                                 | <b>14</b> |

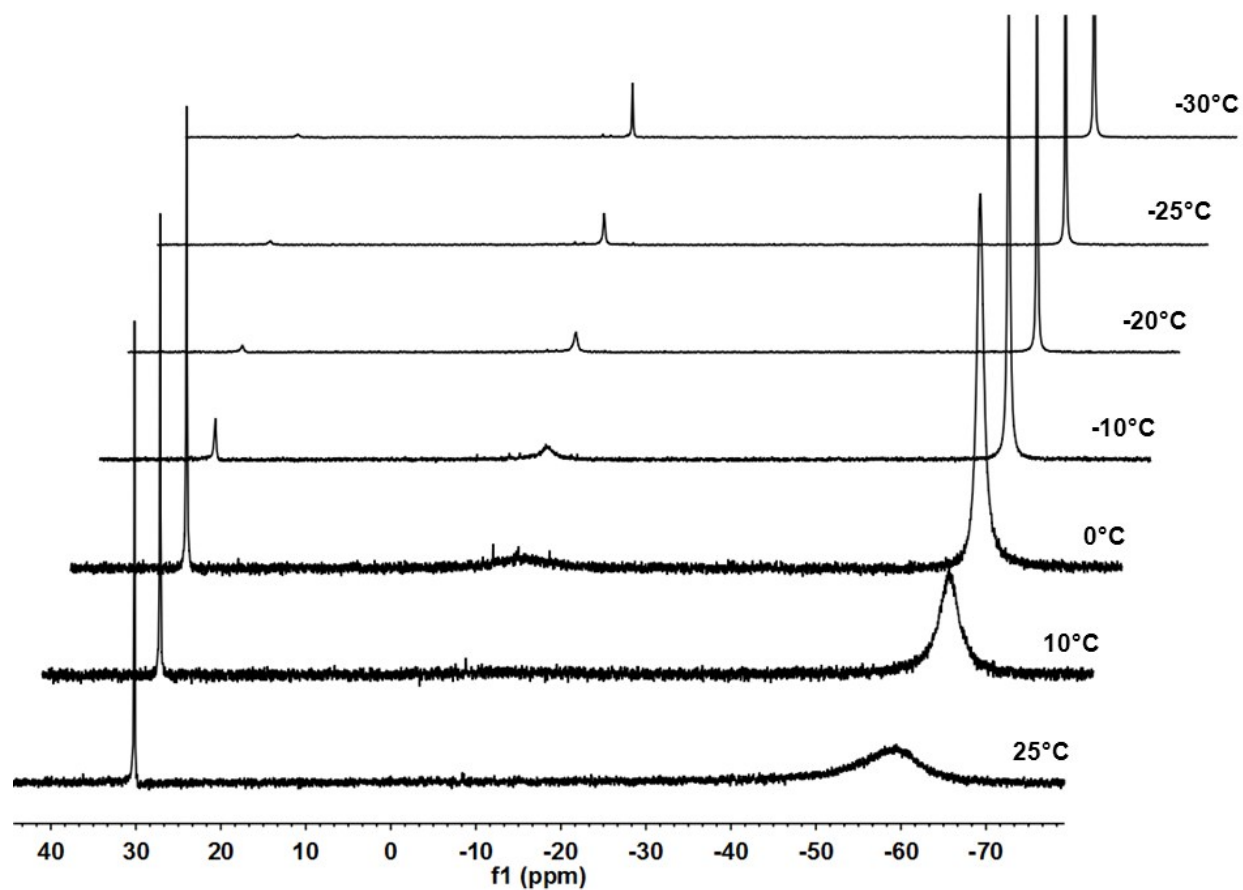

**Figure S 1:** Low-temperature  $^{31}\text{P}$  NMR spectrum of complex **2** with OPMe<sub>3</sub> and excess PMe<sub>3</sub> in toluene- $d_8$ . The signal at -9.5 ppm is the signal corresponding to complex **2**. The signal at 30 ppm is the OPMe<sub>3</sub> and disappears upon precipitation of OPMe<sub>3</sub> at low temperature.

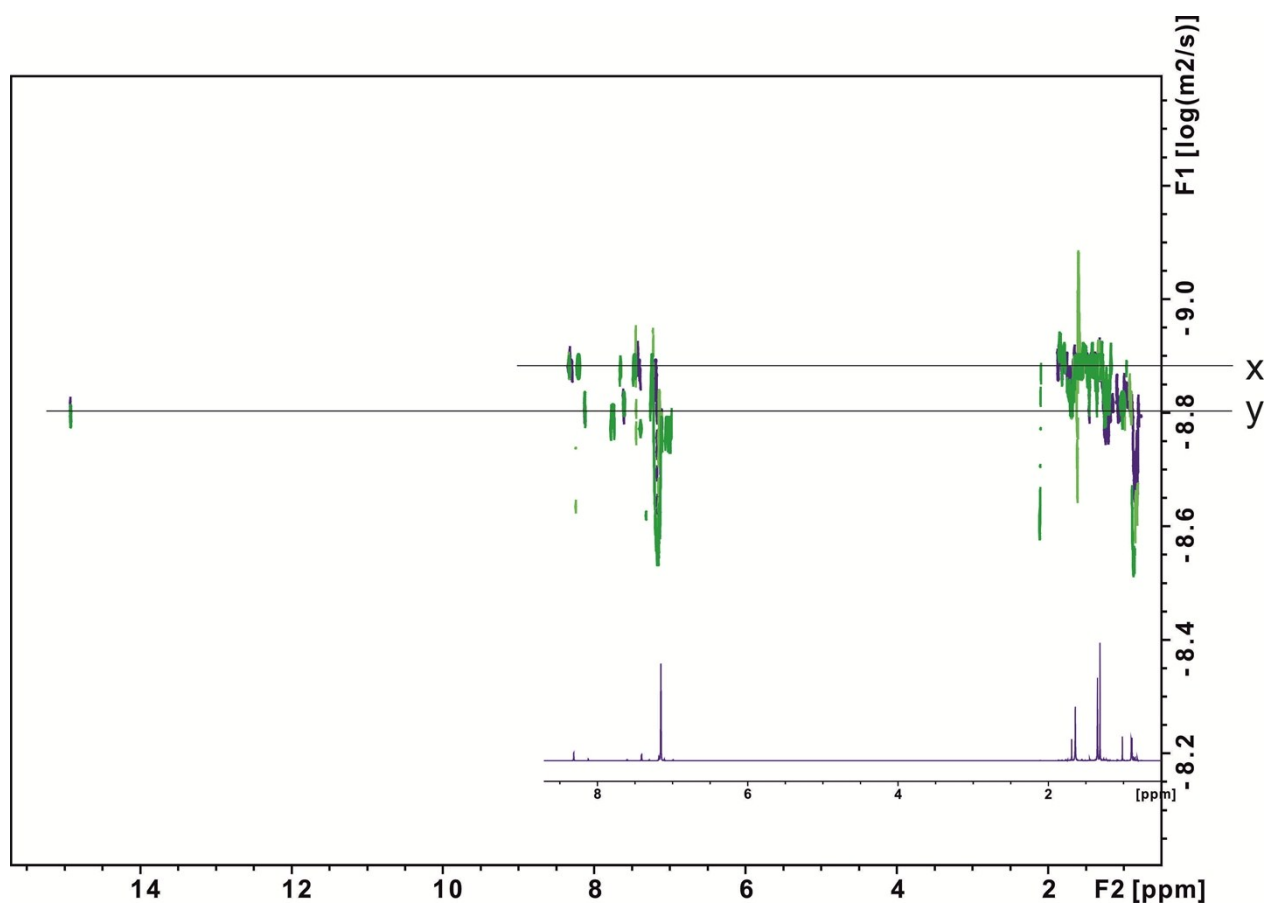

**Figure S 2:** Overlay of 2D DOSY spectra in benzene- $d_6$  at 298 K of complex **2** + free ligand (purple), complex **1** + complex **2** (light green) and complex **1** + complex **3** + free ligand (dark green). Mixtures were chosen to allow calculation of the relative size of the complexes in comparison to the free ligand. It also allows direct comparison of **2** and **3** to **1** from which we know the monomeric nature. The three complexes **1**, **2** and **3** have the same diffusion coefficient  $D = -8.878 \log(\text{m}^2/\text{s})$  indicated by the **x** line. The free ligand has a diffusion coefficient  $D = -8.805 \log(\text{m}^2/\text{s})$  indicated by the **y** line. A 1D  $^1\text{H}$  spectrum of complex **2** in benzene- $d_6$  is shown in the inset. Based on the Stokes-Einstein equation, the relative hydrodynamic radii of two components are related to the diffusion coefficients by  $D_1/D_2 = r_2/r_1$ . Therefore, the experimental diffusion coefficients of the complexes and free ligand correspond to relative hydrodynamic radii of 1.18:1.

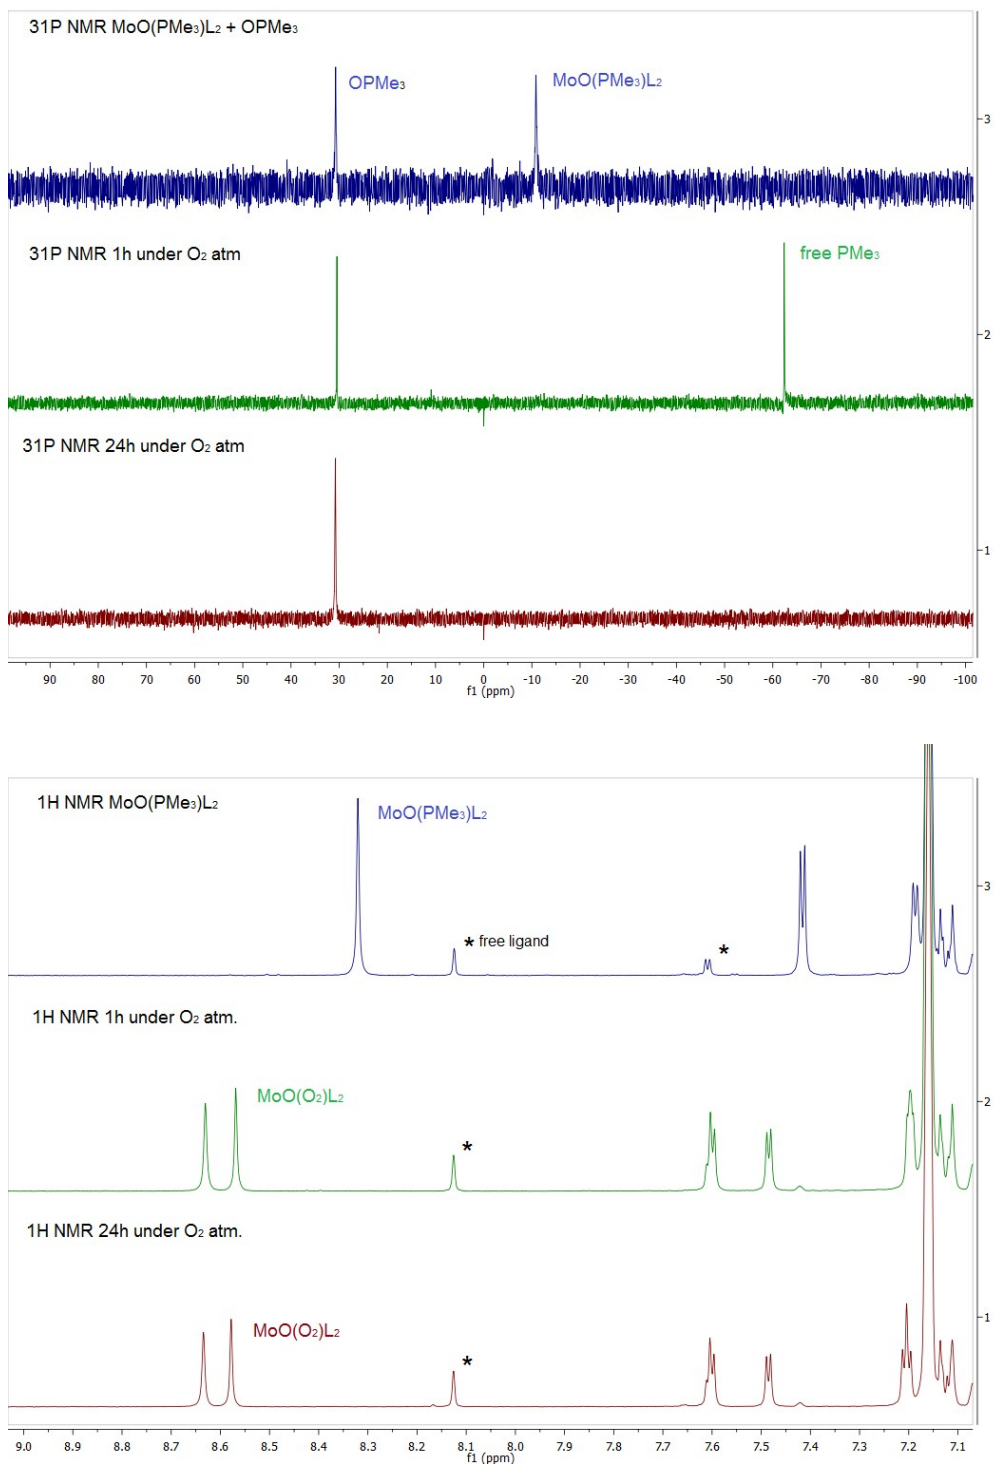

**Figure S 3:**  $^{31}\text{P}$  and  $^1\text{H}$  NMR spectra in benzene- $d_6$  of the re-oxidation of the complex  $[\text{MoO}(\text{PMe}_3)\text{L}_2]$  **2** with  $\text{O}_2$ . The  $\text{PMe}_3$  molecule bound to Mo in complex **2** is initially released when the complex reacts with  $\text{O}_2$  to form the oxo-peroxo complex **4**, then converted to  $\text{OPMe}_3$ .

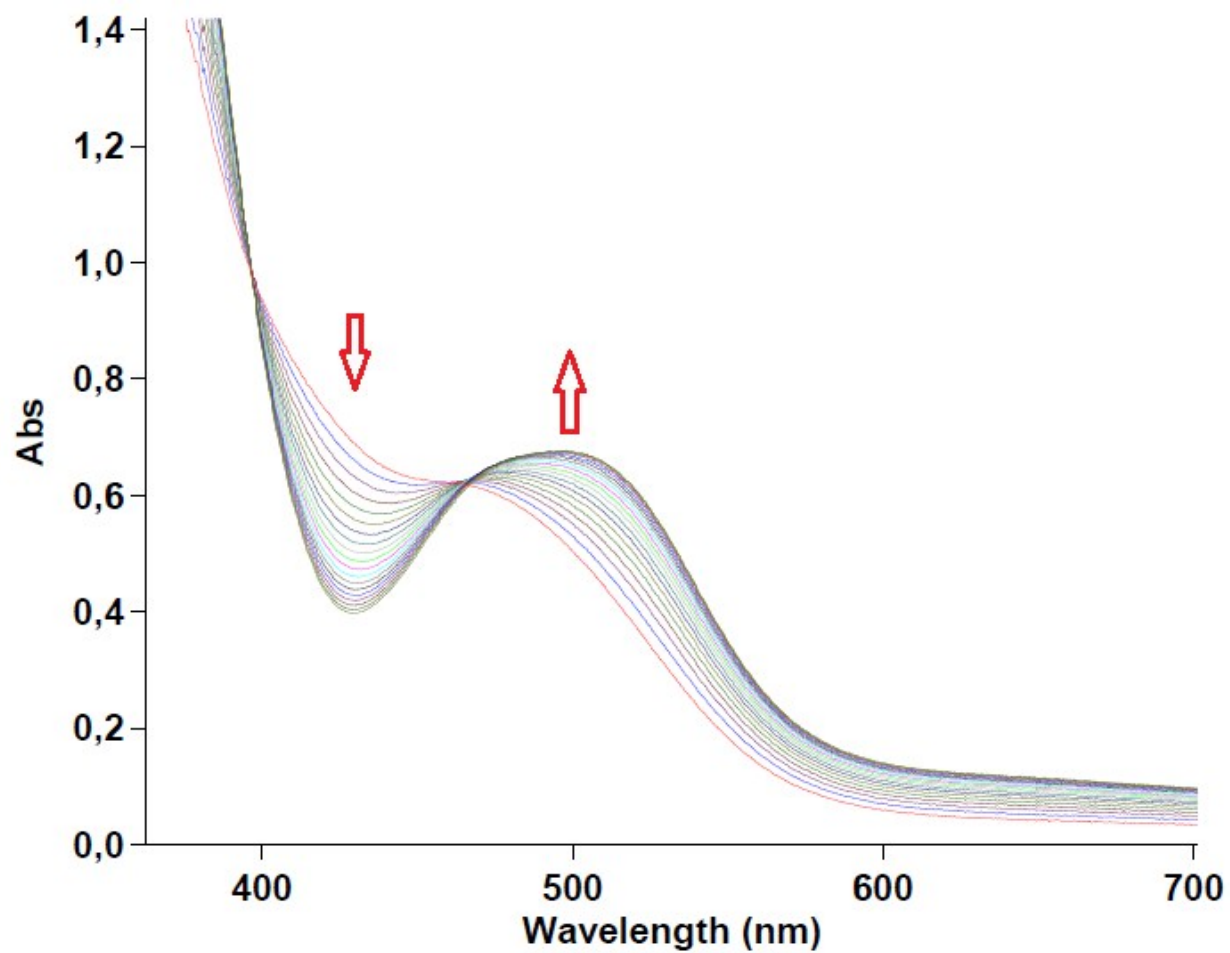

**Figure S 4:** UV-Vis spectra of the reaction of **1** + 100 equiv  $\text{PMe}_3$  in toluene at room temperature from  $t = 0$  to 15 minutes.

**Oxygen Atom Transfer reactivity of [MoO(O<sub>2</sub>)L<sub>2</sub>] (4).** [MoO(O<sub>2</sub>)L<sub>2</sub>] (25 mg, 0.035 mmol, 1 equiv) was dissolved in dry benzene-d<sub>6</sub> under inert conditions in a Young NMR tube. 2 equivalent PMe<sub>3</sub> (8 μL, 0.07 mmol) was added using a micropipette. The OAT reaction was monitored by <sup>1</sup>H and <sup>31</sup>P NMR spectroscopy.

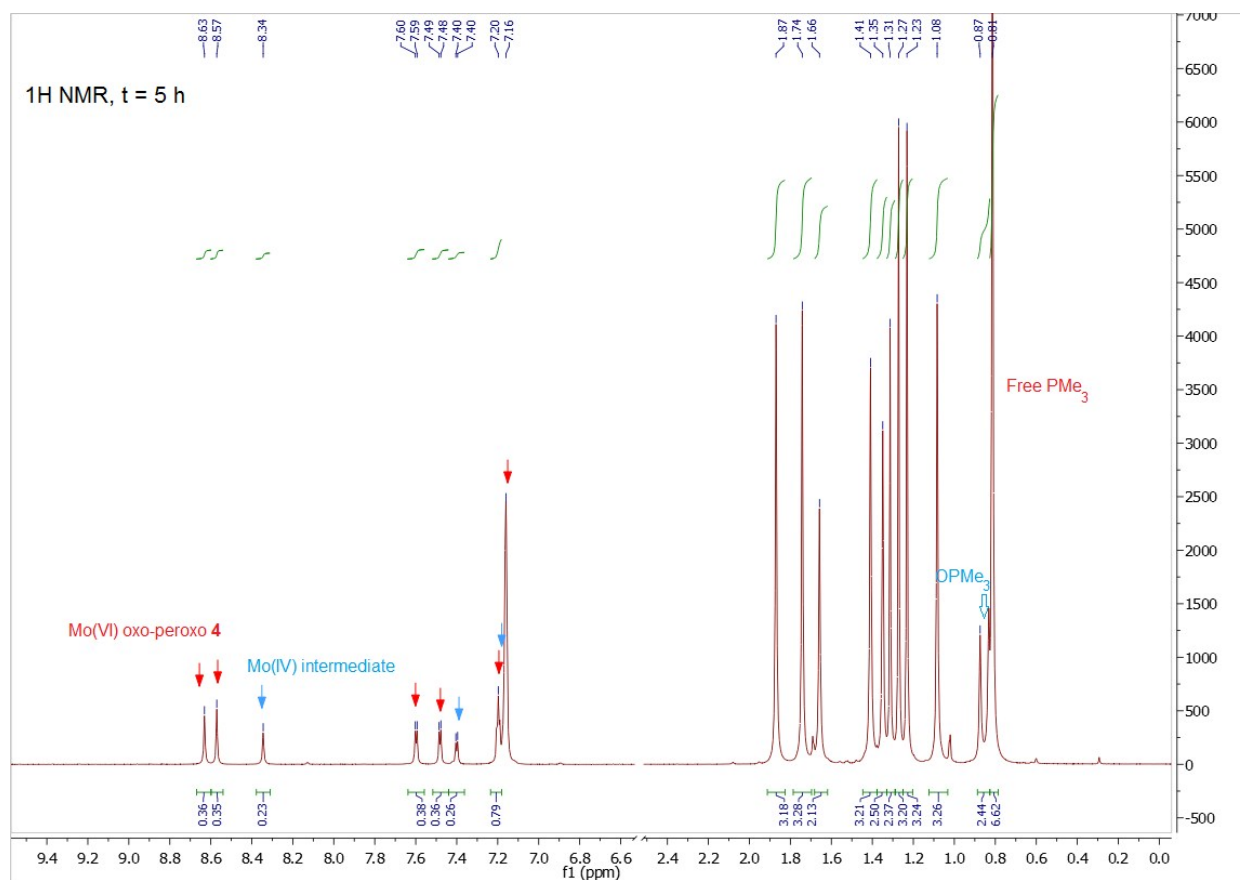

**Figure S 5:** <sup>1</sup>H NMR spectrum at t = 5 h of the reaction of molybdenum oxo-peroxo complex **4** with 2 equiv PMe<sub>3</sub> in benzene-d<sub>6</sub> under O<sub>2</sub> exclusion.

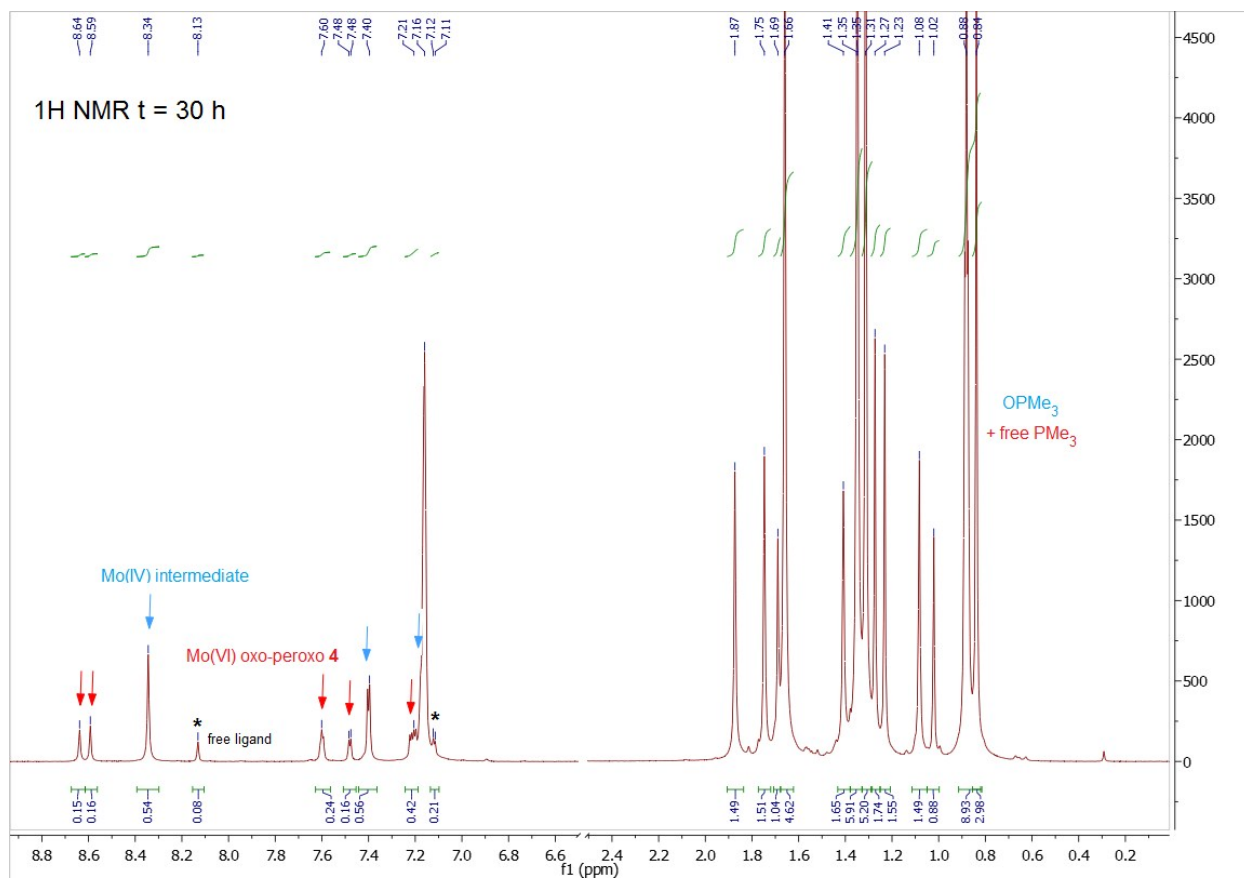

**Figure S 6:**  $^1\text{H}$  NMR spectrum at  $t = 30$  h of the reaction of molybdenum oxo-peroxo complex **4** with 2 equiv  $\text{PMe}_3$  in benzene- $\text{d}_6$  under  $\text{O}_2$  exclusion.

**Catalytic oxidation of trimethylphosphine.**  $[\text{MoO}_2\text{L}_2]$  (complex 1, 10 mg, 14  $\mu\text{mol}$ ) was placed in a Schlenk flask in the glovebox. The Schlenk flask was evacuated then refilled with dry  $\text{O}_2$ . Dry benzene- $\text{d}_6$  (2 mL) and trimethylphosphine (108 mg, 0.15  $\mu\text{L}$ , 1.4 mmol, 100 equiv) were added and the reaction was left to stir under  $\text{O}_2$  atmosphere for 24 h. The reaction was monitored by  $^1\text{H}$  and  $^{31}\text{P}$  NMR at  $t = 4$  h, 20 h and 24 h. After removal of the solvent, the mass balance was calculated and the yield of  $\text{OPMe}_3$  confirmed by integration of the signals in the  $^1\text{H}$  NMR spectrum at  $t = 24$  h (yield = 19 %).

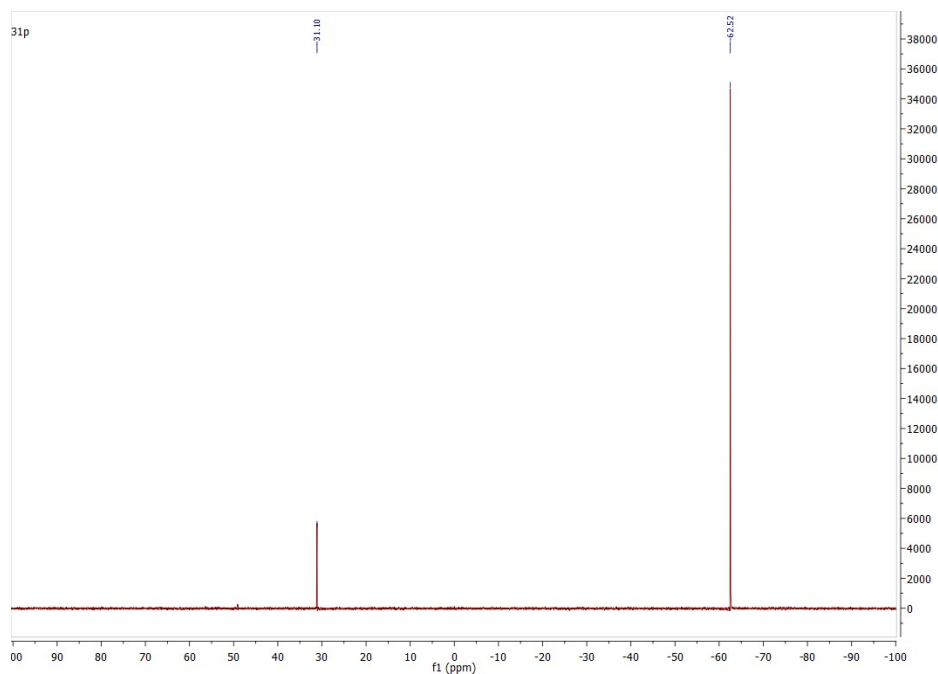

**Figure S 7:**  $^{31}\text{P}$  NMR spectrum at  $t = 24$  h of the catalytic oxidation of  $\text{PMe}_3$  under  $\text{O}_2$  atmosphere using 1 mol-% of complex **1**.

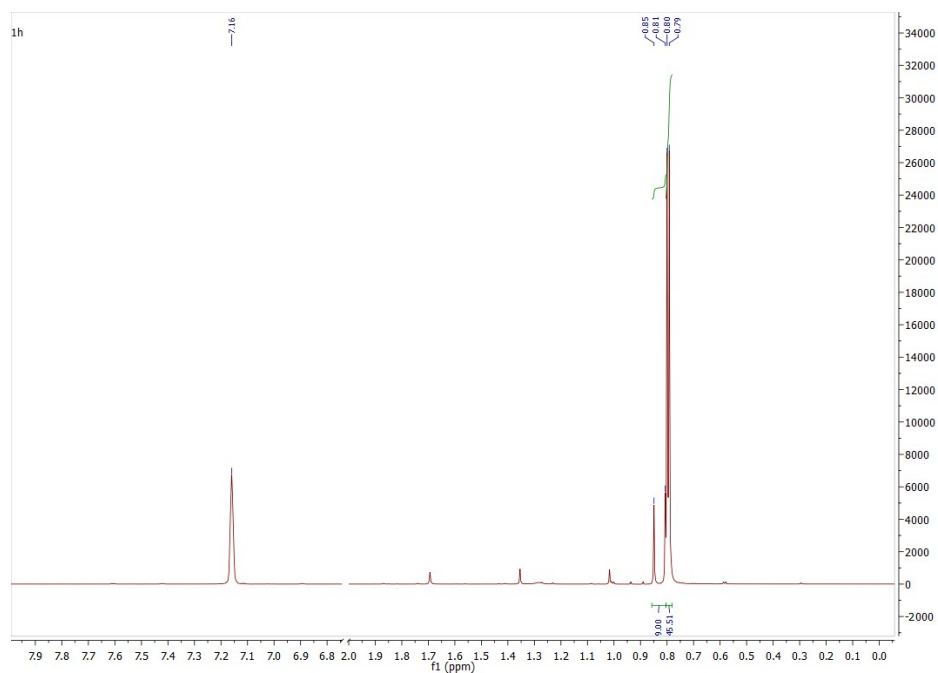

**Figure S 8:**  $^1\text{H}$  NMR spectrum at  $t = 24$  h of the catalytic oxidation of  $\text{PMe}_3$  under  $\text{O}_2$  atmosphere using 1 mol-% of complex **1**. The doublet at 0.80 ppm is free  $\text{PMe}_3$ , the doublet at 0.83 ppm is  $\text{OPMe}_3$ . Other peaks arise from free ligand.



To confirm the stability of  $\text{PMe}_3$  under  $\text{O}_2$  atmosphere, a blank experiment was performed. A Schlenk flask was evacuated then refilled with dry  $\text{O}_2$ . Dry benzene- $\text{d}_6$  (2 mL) and trimethylphosphine (108 mg, 0.15  $\mu\text{L}$ , 1.4 mmol, 100 equiv) were added and the reaction was left to stir under  $\text{O}_2$  atmosphere for 24 h. The reaction was monitored by  $^1\text{H}$  and  $^{31}\text{P}$  NMR at  $t = 4$  h, 20 h and 24 h. at  $t = 24$  h, a signal for  $\text{OPMe}_3$  could be observed in the  $^1\text{H}$  NMR (1% yield) but no signal was observed in  $^{31}\text{P}$  NMR. After 24 h, the solvent and free  $\text{PMe}_3$  were evaporated, no solid  $\text{OPMe}_3$  could be isolated.

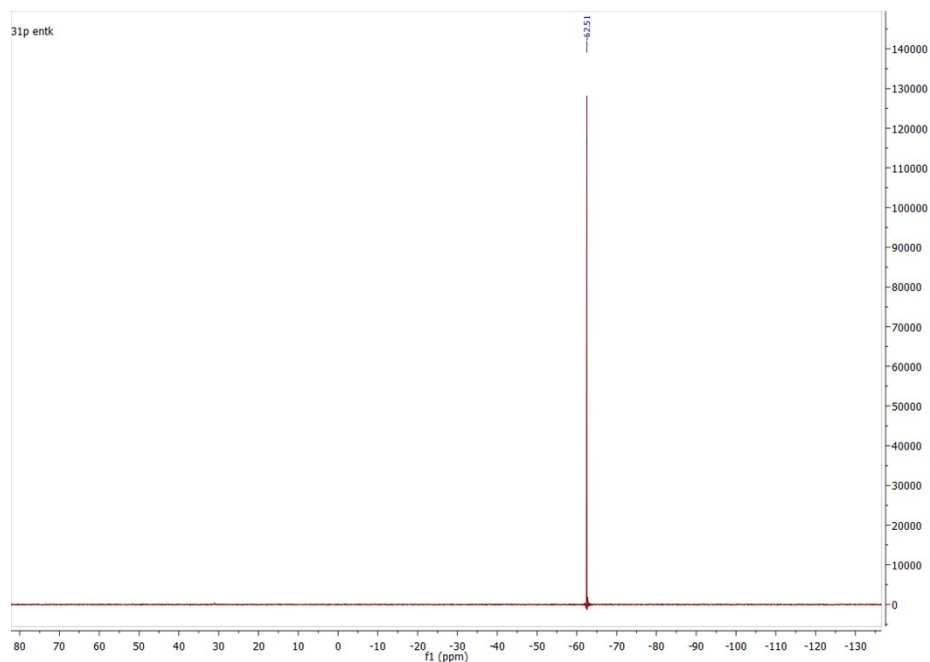

**Figure S 9:**  $^{31}\text{P}$  NMR spectrum at  $t = 24$  h of the catalytic oxidation of  $\text{PMe}_3$  under  $\text{O}_2$  atmosphere in the absence of complex **1**.

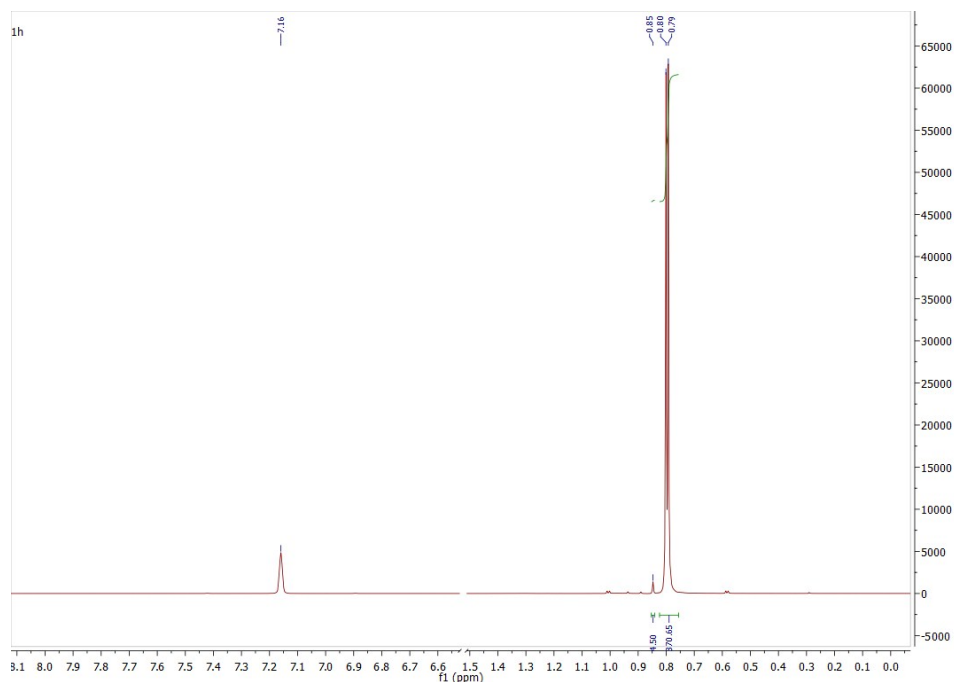

**Figure S 10:**  $^1\text{H}$  NMR spectrum at  $t = 24$  h of the catalytic oxidation of  $\text{PMe}_3$  under  $\text{O}_2$  atmosphere in the absence of complex **1**.

## X-ray structure determination

For X-ray structure analyses the crystals were mounted onto the tip of glass fiber and data collection was performed at 100 K using graphite monochromated  $\text{MoK}_\alpha$  radiation ( $\lambda = 0.71073\text{\AA}$ ) with a BRUKER-AXS SMART APEX II diffractometer equipped with a CCD detector. Essential details of the crystal-data and structure refinements for compounds **1** and **4** are summarized in Table 1. Crystallographic data for the structures of compounds **1** and **4** have been deposited with the Cambridge Crystallographic Data Center [CCDC-1413968 for **1**, CCDC-1413969 for **4**]. These data can be obtained free of charge from The Cambridge Crystallographic Data Centre via [www.ccdc.cam.ac.uk/data\\_request/cif](http://www.ccdc.cam.ac.uk/data_request/cif).

**Crystal Structure Determination of 1.** The structure was solved by direct methods (SHELXS-97) and refined by full-matrix least-squares techniques against  $F^2$  (SHELXL-2014/6). The non-

hydrogen atoms were refined with anisotropic displacement parameters without any constraints. The H atoms of the phenyl rings as well as the H atoms bonded to the C atom of a C=N double bond were put at the external bisectors of the C–C–X angles at C–H distances of 0.95Å and common isotropic displacement parameters were refined for these H atoms of the same ligand. The H atoms of the methyl groups were refined with common isotropic displacement parameters for the H atoms of the same *tert*-butyl group and idealized geometries with tetrahedral angles, enabling rotation around the C–C bonds, and C–H distances of 0.98Å.

**Crystal Structure Determination of 4.** The structure could be solved (SHELXS-97) by interpretation of the patterson map (second solution) in the non-centrosymmetric space group C 2, but not in centrosymmetric C 2/c. After completion of the molecule an inversion center could be detected and the structure was refined by full-matrix least-squares techniques against F2 (SHELXL-2014/6) in the centric space group C 2/c after an appropriate shift of the origin. A void of approx. 188Å<sup>3</sup> is occupied by a THF molecule disordered over two orientations lying near a center of symmetry or by a n-pentane molecule at the inversion center. The ratio of the refined occupation factors is 0.768(6) to 0.232(6). The non-hydrogen atoms of the solvent molecules were refined with isotropic displacement parameters with some restraints. The H atoms of the solvent molecules were included at calculated positions with their isotropic displacement parameters fixed to 1.2 times  $U_{eq}$  of the C atom they are bonded to. The non-hydrogen atoms of the metal complex were refined with anisotropic displacement parameters without any constraints. The H atoms of the phenyl rings were put at the external bisectors of the C–C–C angles at C–H distances of 0.95Å and common isotropic displacement parameters were refined for the H atoms of the same ring. The H atoms H10 and H30 were put at the external bisector of the C–C–C angle at a C–H distance of 0.95Å but the individual isotropic displacement parameters were free to refine. The H atoms of the methyl groups were refined with common isotropic displacement parameters for the H atoms of the same group and idealized geometries with tetrahedral angles, enabling rotation around the C–C bond, and C–H distances of 0.98Å.

**Table S 1:** Crystallographic data and structure refinements for complexes **1** and **4**

|                                                      | <b>1</b>                                                        | <b>4</b>                                                                                                                                                    |
|------------------------------------------------------|-----------------------------------------------------------------|-------------------------------------------------------------------------------------------------------------------------------------------------------------|
| empirical formula                                    | C <sub>38</sub> H <sub>60</sub> MoN <sub>2</sub> O <sub>4</sub> | 2 MoO <sub>5</sub> N <sub>2</sub> C <sub>38</sub> H <sub>60</sub> · x C <sub>4</sub> H <sub>8</sub> O · (1-x) C <sub>5</sub> H <sub>12</sub> ; x = 0.786(6) |
| formula weight                                       | 704.82                                                          | 1513.75                                                                                                                                                     |
| crystal description                                  | plate, red                                                      | block, red                                                                                                                                                  |
| crystal size (mm)                                    | 0.27 x 0.17 x 0.05mm                                            | 0.32 x 0.25 x 0.25                                                                                                                                          |
| crystal system, space group                          | monoclinic, P 21/n                                              | monoclinic, C 2/c                                                                                                                                           |
| Unit cell dimensions, a (Å)                          | 10.3863(4)                                                      | 24.3085(13)                                                                                                                                                 |
| b (Å)                                                | 11.4627(5)                                                      | 15.8102(8)                                                                                                                                                  |
| c (Å)                                                | 33.1945(13)                                                     | 20.8035(11)                                                                                                                                                 |
| α (deg)                                              | 90                                                              | 90                                                                                                                                                          |
| β (deg)                                              | 98.6499(17)                                                     | 94.112(2)                                                                                                                                                   |
| γ (deg)                                              | 90                                                              | 90                                                                                                                                                          |
| volume (Å <sup>3</sup> )                             | 3907.0(3)                                                       | 7974.7(7)                                                                                                                                                   |
| Z, Calculated density (gcm <sup>-3</sup> )           | 4, 1.198                                                        | 4, 1.261                                                                                                                                                    |
| F(000)                                               | 1504                                                            | 3233.9                                                                                                                                                      |
| linear absorption coefficient μ (mm <sup>-1</sup> )  | 0.373                                                           | 0.373                                                                                                                                                       |
| absorption correction                                | semi-empirical from equiv.                                      | semi-empirical from equiv.                                                                                                                                  |
| temperature (K)                                      | 100                                                             | 100                                                                                                                                                         |
| wavelength (MoK <sub>α</sub> ) (Å)                   | 0.71073                                                         | 0.71073                                                                                                                                                     |
| theta range for data collection (deg)                | 2.46 to 28.45                                                   | 1.79 to 30.00                                                                                                                                               |
| limiting indices                                     | -12 ≤ h ≤ 12<br>-5 ≤ k ≤ 14<br>-40 ≤ l ≤ 40                     | -34 ≤ h ≤ 29<br>-22 ≤ k ≤ 22<br>-29 ≤ l ≤ 29                                                                                                                |
| reflections collected / unique                       | 26791 / 7661                                                    | 46647 / 11648                                                                                                                                               |
| reflections with I > 2σ(I)                           | 5550                                                            | 10882                                                                                                                                                       |
| R(int), R(sigma)                                     | 0.0549, 0.0723                                                  | 0.0187, 0.0148                                                                                                                                              |
| completeness to theta max.                           | 0.999                                                           | 0.999                                                                                                                                                       |
| refinement method                                    | full matrix least squares on F <sup>2</sup>                     | full matrix least squares on F <sup>2</sup>                                                                                                                 |
| data / restraints / parameters                       | 7661 / 432 / 0                                                  | 11648 / 486 / 12                                                                                                                                            |
| goodness-of-fit on F <sup>2</sup>                    | 1.107                                                           | 1.100                                                                                                                                                       |
| final R1 <sup>a</sup> ) wR2 <sup>b</sup> ) [I>2σ(I)] | R1 = 0.0585<br>wR2 = 0.1401                                     | R1 = 0.0277<br>wR2 = 0.0689                                                                                                                                 |
| R indices (all data)                                 | R1 = 0.0869<br>wR2 = 0.1507                                     | R1 = 0.0304<br>wR2 = 0.0709                                                                                                                                 |
| largest diff. peak and hole (eÅ <sup>-3</sup> )      | 1.484 and -2.767                                                | 1.283 and -0.599                                                                                                                                            |

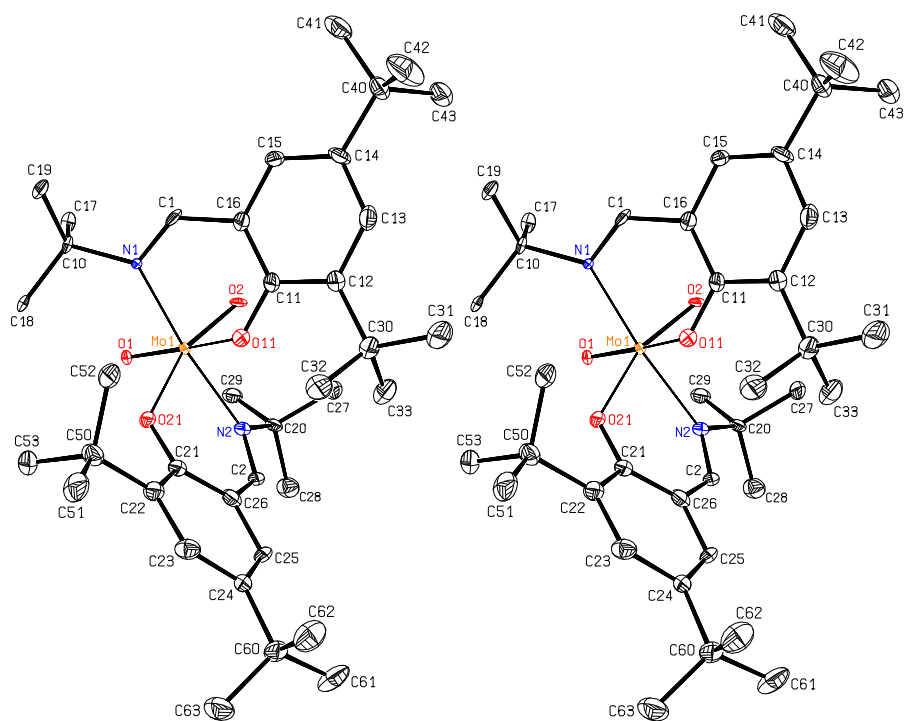

**Figure S 11:** Stereoscopic ORTEP plot of **1** showing the atomic numbering scheme. The probability ellipsoids are drawn at the 50% probability level. The H atoms were omitted for clarity reasons.

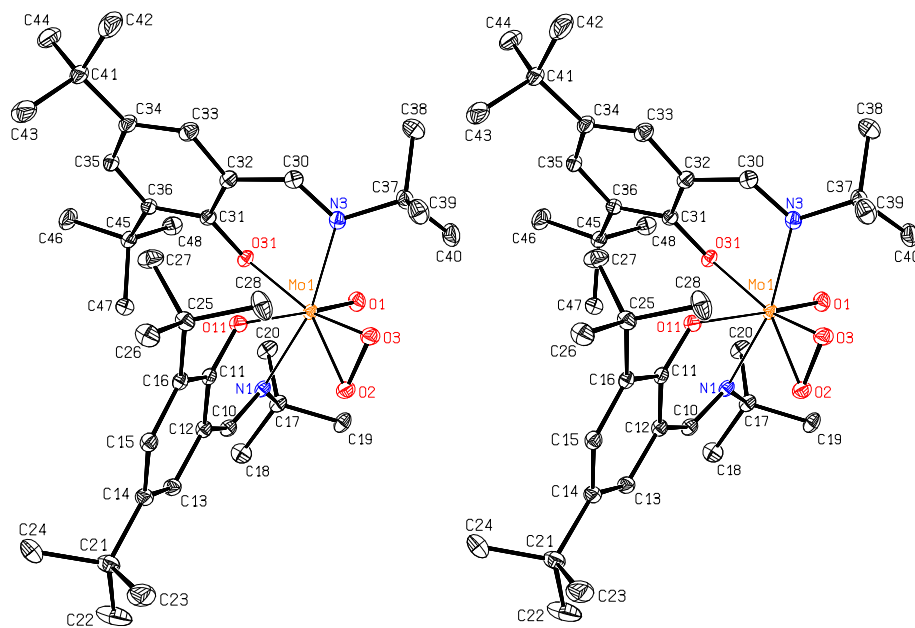

**Figure S 12:** Stereoscopic ORTEP plot of **4** showing the atomic numbering scheme. The probability ellipsoids are drawn at the 50% probability level. The H atoms were omitted for clarity reasons.
